## *C. elegans* HIF-1 is broadly required for survival in hydrogen sulfide

Irini Topalidou and Dana L Miller

University of Washington School of Medicine, Department of Biochemistry, Seattle, WA  
98195

Running title: HIF-1 in hydrogen sulfide

Key words: hydrogen sulfide, hypoxia, tissue-specific expression

Corresponding author:

Dana L Miller  
UW box 357350  
HSB J-587  
Seattle, WA 98195

Phone 206-685-5025  
email [dml16@uw.edu](mailto:dml16@uw.edu)

1 **ABSTRACT**

2 Hydrogen sulfide is common in the environment, and is also endogenously produced  
3 by animal cells. Although hydrogen sulfide is often toxic, exposure to low levels of  
4 hydrogen sulfide improves outcome in a variety of mammalian models of ischemia-  
5 reperfusion injury. In *Caenorhabditis elegans*, the initial transcriptional response to  
6 hydrogen sulfide depends on the *hif-1* transcription factor, and *hif-1* mutant animals die  
7 when exposed to hydrogen sulfide. In this study, we use rescue experiments to identify  
8 tissues in which *hif-1* is required to survive exposure to hydrogen sulfide. We find that  
9 expression of *hif-1* from the *unc-14* promoter is sufficient to survive hydrogen sulfide.  
10 Although *unc-14* is generally considered to be a pan-neuronal promoter, we show that it  
11 is active in many non-neuronal cells as well. Using other promoters, we show that pan-  
12 neuronal expression of *hif-1* is not sufficient to survive exposure to hydrogen sulfide.  
13 Our data suggest that *hif-1* is required in many different tissues to direct the essential  
14 response to hydrogen sulfide.

15

## 16 INTRODUCTION

17 Hydrogen sulfide (H<sub>2</sub>S) in the environment is produced by industrial sources  
18 and natural sources, including volcanic deposits and anaerobic bacteria (Beauchamp *et*  
19 *al.*, 1984). H<sub>2</sub>S is also endogenously produced as a product of the cysteine biosynthesis  
20 through the transsulfuration pathway, and endogenous H<sub>2</sub>S has important roles in  
21 cellular signaling (Li *et al.*, 2011; Vandiver and Snyder, 2012; Wang, 2012). Chronic  
22 exposure to relatively low concentrations of environmental H<sub>2</sub>S in humans has been  
23 associated with neurological, respiratory, and cardiovascular dysfunction (Kilburn and  
24 Warshaw, 1995; Richardson, 1995; Bates *et al.*, 2002). However, transient exposure to  
25 low H<sub>2</sub>S has also been shown to improve outcome in many mammalian models of  
26 ischemia-reperfusion injury (Bos *et al.*, 2015; Wu *et al.*, 2015). It is possible that the  
27 biological effects of exogenous H<sub>2</sub>S exposure, both beneficial and detrimental, result  
28 from activation of pathways that are normally regulated by endogenous H<sub>2</sub>S.

29 *C. elegans* is an excellent system to define physiological responses to exogenous  
30 H<sub>2</sub>S. In addition to powerful genetics, all cells are directly exposed to the gaseous  
31 environment (Shen and Powell-Coffman, 2003). This feature allows for control of  
32 cellular H<sub>2</sub>S exposure without confounding factors from physiological regulation gas  
33 delivery. *C. elegans* grown in H<sub>2</sub>S are long-lived, thermotolerant, and resistant to  
34 hypoxia-induced disruptions of proteostasis (Miller and Roth, 2007; Fawcett *et al.*, 2015).  
35 HIF-1 directs the transcriptional response to H<sub>2</sub>S in *C. elegans* (Budde and Roth, 2010;  
36 Miller *et al.*, 2011). HIF-1 is a highly-conserved transcription factor best known for  
37 regulating the transcriptional response to low oxygen (hypoxia) in metazoans  
38 (Semenza, 2000; Semenza, 2001). *C. elegans hif-1* mutant animals are viable and fertile in  
39 room air but die if exposed to hypoxia during embryogenesis (Jiang *et al.*, 2001; Miller

40 and Roth, 2009). In contrast, exposure to H<sub>2</sub>S is lethal for *hif-1* mutant animals at all  
41 developmental stages (Budde and Roth, 2010).

42         Several studies have argued for neuronal-specific functions of HIF-1, though the  
43 *hif-1* promoter is active in most, if not all, cells and HIF-1 protein is stabilized  
44 ubiquitously in *C. elegans* exposed to either hypoxia or H<sub>2</sub>S (Jiang *et al.*, 2001; Budde and  
45 Roth, 2010). Neuronal expression of *hif-1* in hypoxia is reported to be sufficient to  
46 prevent hypoxia-induced diapause and to increase lifespan through induction of  
47 intestinal expression of *fmo-2* (Miller and Roth, 2009; Leiser *et al.*, 2015). Furthermore,  
48 neuronal CYSL-1 protein regulates the activity of HIF-1 to modulate behavioral  
49 responses to changes in oxygen availability (Ma *et al.*, 2012). These data motivated us to  
50 determine if neuronal HIF-1 activity is sufficient for *C. elegans* to survive exposure to  
51 H<sub>2</sub>S.

52         In this study, we used tissue-specific rescue of *hif-1* to define the site of essential  
53 HIF-1 activity in low H<sub>2</sub>S. We found that expression of *hif-1* from the *unc-14* promoter  
54 was sufficient for survival in H<sub>2</sub>S. Although considered a pan-neuronal promoter  
55 (Ogura *et al.*, 1997; Pocock and Hobert, 2008), our data indicate that the *unc-14* promoter  
56 is also broadly expressed in non-neuronal cells. We show that *hif-1* expressed from the  
57 pan-neuronal *rab-3* promoter is not sufficient for viability in H<sub>2</sub>S. We further  
58 demonstrate that expression of *hif-1* in muscle, hypodermis, or intestine is not sufficient  
59 for viability in low H<sub>2</sub>S. Together, our data indicate that the activity of HIF-1 may be  
60 required in multiple tissues to coordinate the organismal response to H<sub>2</sub>S.

61

## 62 MATERIALS AND METHODS

### 63 Strains

64 Strains were grown at room temperature on nematode growth media plates (NGM)  
65 seeded with the OP50 strain of *E. coli* (Brenner, 1974). All strains were derived from N2  
66 (Bristol). Full genotypes of strains used in this study are in Table 1. To sequence the  
67 *Punc-14::hif-1* junction of *otIs197*, the region was amplified with forward primer oET479  
68 (5'- GTTGTCCACCATCACAGTAATACG) and reverse primer oET480 (5'-  
69 ACGACGGCGTTCCATG). The oET479 primer was used for sequencing.

70

### 71 Constructs and transgenes

72 All constructs were made using the multisite Gateway system (Invitrogen) where a  
73 promoter region, a gene region (*hif-1* cDNA or GFP), and a C-terminal 3'UTR were  
74 cloned into the destination vector pCFJ150 (Frøkjær-Jensen *et al.*, 2008). The *hif-1* A  
75 isoform was amplified from cDNA using forward primer oET467 (5'-  
76 GGGGACAAGTTTGTACAAAAAAGCAGGCTCAATGGAAGACAATCGGAAAAGA  
77 AAC) and reverse primer oET469 (5'-  
78 GGGGACCACTTTGTACAAGAAAGCTGGGTGTCAAGAGAGCATTGGAAATGGG).

79 For the tissue-specific rescuing experiments, an operon GFP::H2B was included in the  
80 expression constructs downstream of the 3'UTR (Frøkjær-Jensen *et al.*, 2012). This  
81 resulted in expression of untagged HIF-1 protein and histone H2B fused to GFP, which  
82 allowed for confirmation of promoter expression by monitoring GFP expression. The  
83 *unc-14* promoter (1425 bp upstream of the start codon) was amplified from genomic  
84 DNA using forward primer oET520 (5'-  
85 GGGGACAACCTTTGTATAGAAAAGTTGGAGAGCAGCAGCATCTCGAG) and  
86 reverse primer oET507 (5'-

87 GGGGACTGCTTTTTTGTACAACTTGTTTTGGTGGGAAGAATTGAGGG). All  
88 plasmids constructed were verified by sequencing. Constructs used in this study are in  
89 Table 2. Extrachromosomal arrays were made by standard injection methods (Mello *et*  
90 *al.*, 1991) with 10-15 ng/ $\mu$ l of the expression vector. At least two independent lines were  
91 isolated for each construct.

92

### 93 **H<sub>2</sub>S atmospheres**

94 Construction of atmospheric chambers was as previously described (Miller and Roth,  
95 2007; Fawcett *et al.*, 2012). In short, H<sub>2</sub>S (5000 ppm with balance N<sub>2</sub>) was diluted  
96 continuously with room air to a final concentration of 50 ppm. Final H<sub>2</sub>S concentration  
97 was monitored using a custom-built H<sub>2</sub>S detector containing a three-electrode  
98 electrochemical Surecell H<sub>2</sub>S detector (Sixth Sense) as described (Miller and Roth, 2007),  
99 calibrated with 100 ppm H<sub>2</sub>S with balance N<sub>2</sub>. Compressed gas mixtures were obtained  
100 from Airgas (Radnor, PA) and certified standard to within 2% of the indicated  
101 concentration.

102

### 103 **Survival assays**

104 Twenty to forty L4 animals were picked to plates seeded with OP50. Plates were  
105 exposed to 50ppm H<sub>2</sub>S for 20-24 hours, and then returned to room air to score viability.  
106 Death was defined as failure to move when probed with a platinum wire on the head or  
107 tail.

108

### 109 **Imaging**

110 For imaging expression of GFP, larval stage 1 (L1) or first-day adult animals were  
111 mounted on 2% agarose pads and anesthetized with 50 mM sodium azide for ten  
112 minutes before placing the cover slip. The images were obtained using a Nikon 80i  
113 wide-field compound microscope.

114

#### 115 **Reagent Availability**

116 Strains are available upon request and have been deposited at the *Caenorhabditis*  
117 Genetics Center (cgc.umn.edu). Plasmid constructs are available upon request.



## 118 RESULTS AND DISCUSSION

119 *C. elegans* requires *hif-1* to survive exposure to low H<sub>2</sub>S (Budde and Roth, 2010).

120 To determine whether neuronal expression of *hif-1* was sufficient for survival in H<sub>2</sub>S, we  
121 used transgenic *hif-1(ia04)* mutant animals that expressed *hif-1* from heterologous  
122 promoters. We first used the available *otIs197* transgene, which expresses *hif-1* from the  
123 putative pan-neuronal *unc-14* promoter (Pocock and Hobert, 2008). We found that *hif-*  
124 *1(ia04); otIs197* animals survived exposure to 50 ppm H<sub>2</sub>S (Figure 1A). This result  
125 suggests that neuronal expression of *hif-1*, from the *unc-14* promoter, is sufficient to  
126 survive exposure to H<sub>2</sub>S.

127 To further dissect which neuronal cell type(s) HIF-1 activity was required to  
128 survive exposure to H<sub>2</sub>S, we generated transgenic animals that expressed *hif-1* cDNA  
129 under the control of promoters active in specific neuronal subtypes. We found that  
130 expression in neither cholinergic neurons (*Punc-17*) nor in GABAergic neurons (*Punc-*  
131 *47*) was sufficient to rescue the lethality of *hif-1(ia04)* mutant animals exposed to H<sub>2</sub>S  
132 (Figure 1A). Curiously, we also observed that expression of *hif-1* cDNA from the pan-  
133 neuronal *rab-3* promoter did not rescue survival of the *hif-1(ia04)* mutant animals  
134 (Figure 1A). This was unexpected, as expression of HIF-1 from the *unc-14* promoter (the  
135 *otIs197* transgene) was sufficient for survival in H<sub>2</sub>S. We therefore pursued the source of  
136 this discrepancy.

137 We first sought to verify the molecular nature of the *otIs197* integrated transgene.  
138 We used PCR to amplify a region from the *unc-14* promoter and the *hif-1* coding region  
139 from the *otIs197* transgenic animals. As expected, this reaction generated a single band  
140 of ~500 bp. However, when we sequenced the resulting PCR product we discovered an  
141 insertion of an extra G immediately following the ATG of the *hif-1* cDNA. This insertion

142 causes a frame-shift and results in a stop codon after 13 amino acids. However, the  
143 *otIs197* transgene must express some HIF-1 protein, as it can rescue many phenotypes of  
144 *hif-1* mutant animals (Pocock and Hobert, 2008; Miller and Roth, 2009; Ma *et al.*, 2012;  
145 Leiser *et al.*, 2015). The *otIs197* transgene was constructed to express isoform A of *hif-1*,  
146 though there are six predicted isoforms (Wormbase, 2017). We noted that the ATG for  
147 isoform E is approximately 20 bp downstream of the original ATG in the *hif-1* cDNA.  
148 Thus, it could be that expression of the *hif-1e* isoform is the basis of the activity of the  
149 *otIs197* transgene. Because our *Prab-3::hif-1* transgene expressed the *hif-1a* isoform, it  
150 was possible that the differences we observed from *otIs197* was due to the expression of  
151 different *hif-1* isoforms. To test this possibility we created transgenic strains expressing  
152 *hif-1a* under control of the *unc-14* promoter using a *Punc-14::hif-1a(P621A)::YFP* plasmid  
153 (Pocock and Hobert, 2008), which we verified had had the expected *hif-1a(P621A)*  
154 sequence. We injected this plasmid into *hif-1(ia04)* mutant animals to generate the  
155 *yakEx137* transgene. If the rescue we observed in *otIs197* was due to expression of *hif1e*  
156 rather than *hif1a*, then the animals expressing *Punc-14::hif-1a(P621A)::YFP* would die in  
157 H<sub>2</sub>S. However, these animals survived exposure to H<sub>2</sub>S (Figure 1C), indicating that  
158 potential expression of different isoforms did not underlie differences in survival of  
159 exposure to H<sub>2</sub>S.

160 The HIF-1 protein expressed by the *otIs197* transgene has a P621A mutation that  
161 prevents it from being hydroxylated and degraded by the proteasome (Pocock and  
162 Hobert, 2008). In contrast, the constructs we generated produced wild-type HIF-1  
163 protein. We did not expect this feature to be salient for our experiments, since HIF-1  
164 protein is stabilized in H<sub>2</sub>S due to inhibition of the hydroxylation reaction (Budde and  
165 Roth, 2010; Ma *et al.*, 2012). However, it is possible that constitutive stabilization of HIF-

166 1 protein in neurons promotes survival in H<sub>2</sub>S. To evaluate this possibility, we cloned  
167 wild type *hif-1* cDNA under control of the *unc-14* promoter, including 1.4 kb upstream  
168 of the transcription start site (Ogura *et al.*, 1997). We found that *hif-1(ia04); Punc-14::hif-1*  
169 (*yakEx144*) animals survived exposure to H<sub>2</sub>S, similar to *hif-1(ia04); otIs197* animals  
170 (Figure 1C). We conclude that the P621A mutation in *otIs197* does not underlie the  
171 difference in survival in H<sub>2</sub>S that we observe for animals expressing *hif-1* from *rab-3* and  
172 *unc-14* promoters.

173         Given that the only other notable difference between the *Prab-3::hif-1* and *Punc-*  
174 *14::hif-1* constructs is the promoter elements, we hypothesized that differences between  
175 either the levels of expression from these promoters or the identity of the cells where  
176 these promoters are expressed should account for their different behavior. The  
177 transgenic constructs we generated all included an operon GFP::H2B downstream of the  
178 3'UTR (Frøkjær-Jensen *et al.*, 2012). This resulted in expression of untagged HIF-1  
179 protein as well as GFP::H2B. We therefore visualized GFP expression to evaluate the  
180 expression levels and cellular patterns of promoter activity. As expected, GFP  
181 expression from adult *hif-1(ia04); Prab-3::hif-1::operon::GFP::H2B* was exclusively in  
182 neurons (Figure 2A). However, when we imaged adult *hif-1(ia04); Punc-14::hif-*  
183 *1::operon::GFP::H2B* animals that had survived exposure to H<sub>2</sub>S we observed GFP  
184 expression in neurons, as expected, but also in intestinal and hypodermal cells (Figure  
185 2B). We saw similar expression in animals that had not been exposed to H<sub>2</sub>S. To  
186 corroborate this observation, we cloned the *unc-14* promoter upstream of GFP and  
187 injected it into wild-type animals. We then imaged larvae (Figure 2C) and adult animals  
188 (Figure 2D) from three separate lines. We observed expression of GFP was expressed in  
189 numerous cells other than neurons including intestine, hypodermis, muscle, and the

190 uterus. Every animal that we imaged had expression in at least one other cell type other  
191 than neurons (n = 50).

192         Based on our understanding of *Punc-14* expression and the fact that *hif-1(ia04)*;  
193 *Prab-3::hif-1* animals die when exposed to H<sub>2</sub>S (Figure 1A), we inferred that neuronal  
194 HIF-1 activity is not sufficient for survival in H<sub>2</sub>S. We therefore explored whether  
195 expression of *hif-1* exclusively in non-neuronal tissues was sufficient for survival in H<sub>2</sub>S.  
196 For these experiments, we generated transgenes with *hif-1* expressed under control of  
197 the *unc-120* promoter, which is active in body-wall and vulval muscle; the *dpy-7*  
198 promoter, which is active in hypodermis; the *vha-6* promoter, which is active in  
199 intestine; and the ubiquitous *eft-3* promoter. We chose these promoters because they  
200 included many of the tissues that had *unc-14* driven expression of GFP (Figure 2B). As  
201 shown in Figure 3, only the ubiquitously-expressed *Peft-3::hif-1* rescued the lethality of  
202 *hif-1(ia04)* mutants exposed to H<sub>2</sub>S. Although we did not test all possible cell and tissue  
203 types, these data suggest that HIF-1 activity in a single tissue cannot support survival in  
204 H<sub>2</sub>S.

205         The fact that *Punc-14::hif-1* was sufficient for survival in H<sub>2</sub>S (Figure 1A) suggests  
206 that activity of HIF-1 may not be required in all cells. Since we did not observe rescue  
207 when *hif-1* was expressed in a single tissue, we made transgenic animals with  
208 expression of *hif-1* in more than one tissue to determine if we could find a minimal  
209 expression that was sufficient for survival in H<sub>2</sub>S. We found that even animals with *hif-1*  
210 expression in neurons, hypodermis, and intestine (*hif-1(ia04); yakEx146[Prab-3::hif-1,*  
211 *Pvha-6::hif-1, Pdpy-7::hif-1]*) did not survive exposure to H<sub>2</sub>S (Figure 3B). Together, our  
212 data suggests that that HIF-1 activity is required in many tissues to coordinate the  
213 essential response to H<sub>2</sub>S. This could indicate that HIF-1 acts cell autonomously to

214 direct expression of many tissue-specific transcripts that are required to survive  
215 exposure to H<sub>2</sub>S.

216 Although it was reported that *otIs197* expresses *hif-1* selectively in neurons  
217 (Pocock and Hobert, 2008), our data show that the *unc-14* promoter is more broadly  
218 expressed. In fact, others have reported non-neuronal expression of transgenes  
219 expressed under the control of the *unc-14* promoter (Ogura *et al.*, 1997; Wolkow *et al.*,  
220 2000; da Graca *et al.*, 2004). However, the non-neuronal expression we have  
221 demonstrated is much more penetrant than has been previously acknowledged. This is  
222 an important consideration when interpreting the results of experiments using  
223 transgenes driven by *unc-14*, including *hif-1* from *otIs197*. Our data show that non-  
224 neuronal expression from the *unc-14* promoter is significant and that rescue by *unc-14*-  
225 driven transgenes is not sufficient to infer neuronal function of HIF-1 and, presumably,  
226 other proteins.

227

228

## 229 **ACKNOWLEDGEMENTS**

230 We would like to thank Dr. Michael Ailion (University of Washington) for sharing  
231 plasmids, discussing ideas, helping identify the different *C. elegans* tissues, and  
232 providing useful feedback on drafts of this manuscript. We are also grateful to Dr.  
233 Roger Pocock (Monash University) and Dr. Oliver Hobert (Columbia University) for  
234 sharing plasmids and strains. We thank Dr. Suzanne Hoppins (University of  
235 Washington) and Dr. Andrea Wills (University of Washington) for critical reading of  
236 the manuscript. Some strains were provided by the CGC, which is funded by NIH  
237 Office of Research Infrastructure Programs (P40 OD010440). This work was supported

238 by NIH grant R01 ES024958 to DLM. DLM is a New Scholar in Aging of the Ellison

239 Medical Foundation.

240

241 **Figure legends**

242 **Figure 1. HIF-1 expression from the *unc-14* promoter rescues the H<sub>2</sub>S lethality of *hif-***  
243 ***1(ia04)* mutant animals.**

244 (A) Survival of animals exposed to H<sub>2</sub>S. All animals have the null *hif-1(ia04)* mutation.  
245 The *otIs197* integrated array expresses a non-degradable HIF-1 variant. Other constructs  
246 were extrachromosomal arrays that express wild-type HIF-1. The *unc-14* promoter is  
247 expressed pan-neuronally (Ogura *et al.*, 1997), *rab-3* promoter is expressed in most, if  
248 not all, neurons (Nonet *et al.*, 1997), *unc-17* is expressed in cholinergic neurons (Rand *et*  
249 *al.*, 2000), and *unc-47* is expressed in GABAergic neurons (Eastman *et al.*, 1999). Animals  
250 were exposed to 50 ppm H<sub>2</sub>S starting at L4. (B) HIF-1 gene structure and predicted A  
251 and E isoforms (Wormbase, 2017). The P621A mutation that prevents degradation of *hif-*  
252 *1* included in *otIs197* is marked with \*. (C) Survival of animals expressing HIF-1 from  
253 *unc-14* promoter exposed to H<sub>2</sub>S. All animals have the null *hif-1(ia04)* mutation.  
254 Expression of HIF-1 was from extrachromosomal arrays. The *yakEx137* array expresses  
255 non-degradable HIF-1(P621A) and the *yakEx144* array expresses wild-type *hif-1*. For all  
256 panels animals were exposed to 50 ppm H<sub>2</sub>S starting at L4. Average of three  
257 independent experiments is shown, each with n = 20-40 animals. Error bars are  
258 standard error of the mean (SEM).

259

260 **Figure 2. The *unc-14* promoter is active in many non-neuronal cells.**

261 (A) Visualization of GFP expressed from *Prab-3::hif-1::operon::GFP::H2B* (transgene  
262 *yak125*). Tail, head, and ventral cord neurons are shown of the ventral aspect of the  
263 same animal. VG = ventral ganglia. RVG = retrovesicular ganglia. In all images scale bar  
264 is 10 μm. (B) Representative images of adult *hif-1(ia04); Punc-14::hif-1::operon::GFP::H2B*

265 (transgene *yakEx144*) animals. GFP expression in hypodermal and intestinal cells is  
266 shown. Scale bar is 10  $\mu$ m. (C,D) Representative images of (C) L1 and (D) adult  
267 transgenic animals expressing *Punc-14::GFP* (transgene *yakEx142*). Representative  
268 animals are shown with GFP expression in hypodermis, intestine, muscle, uterus,  
269 pharynx, and neurons. Scale bars are 5 $\mu$ m in (C) and 10 $\mu$ m in (D).

270

### 271 **Figure 3. Survival in H<sub>2</sub>S requires broad expression of *hif-1*.**

272 Survival of animals exposed to H<sub>2</sub>S. All animals have the null *hif-1(ia04)* mutation. (A)  
273 Lethality of animals that express *hif-1* only in hypodermis (*Pdpy-7::hif-1; yakEx143*),  
274 intestine (*Pvha-6::hif-1; yakEx136*), or muscle (*Punc-120::hif-1(P621A); otEx3165*). As a  
275 control, *hif-1* was expressed from a ubiquitous promoter (*Peft-3::hif-1; yakEx131*).  
276 Expression was from extrachromosomal arrays. Wild-type *hif-1* was used for all  
277 constructs except the *Punc-120::hif-1(P621A)*, which expresses the non-degradable  
278 variant. (B) Survival of *hif-1(ia04); yakEx146* animals exposed to H<sub>2</sub>S that express *hif-1*  
279 simultaneously in intestine (*Pvha-6::hif-1*), hypodermis (*Pdpy-7::hif-1*), and neurons  
280 (*Prab-3::hif-1*). Average of three independent experiments is shown, each with n = 20-35  
281 animals. Error bars are standard error of the mean (SEM).

282



**Table 1: Strains used in this study**

ZG31: *hif-1(ia4) V*

DLM26: *hif-1(ia4) V; otEx3165[Punc-120::hif-1P621A, Pttx-3::RFP]*

XZ2056: *hif-1(ia4) V; yakEx126[Punc-17::hif-1cDNA, Pmyo-2::mCherry]*

DLM25: *hif-1(ia4) V; otIs197[Punc-14::hif-1P621A, Pttx-3::RFP]*

XZ2065: *hif-1(ia4) V; yakEx131[Peft-3::hif-1cDNA, Pmyo-2::mCherry]*

XZ2074: *hif-1(ia4) V; yakEx136[Pvha-6::hif-1cDNA, Pmyo-2::mCherry]*

XZ2073: *hif-1(ia4) V; yakEx137[Punc-14::hif-1P621A::YFP, Pmyo-2::mCherry]*

XZ2081: *hif-1(ia4) V; yakEx143[Pdpy-7::hif-1cDNA, Pmyo-2::mCherry]*

XZ2080: *yakEx142[Punc-14::GFP, Pmyo-2::mCherry]*

XZ2082: *hif-1(ia4) V; yakEx144[Punc-14::hif-1cDNA, Pmyo-2::mCherry]*

XZ2083: *hif-1(ia4) V; yakEx145[Punc-47::hif-1cDNA, Pmyo-2::mCherry]*

XZ2084: *hif-1(ia4) V ; yakEx125[Prab-3::hif-1cDNA, Pmyo-2::mCherry]*

XZ2085: *hif-1(ia4) V ; yakEx146[Pvha-6::hif-1cDNA, Pdpy-7::hif-1cDNA, Prab-3::hif-1cDNA, Pmyo-2::mCherry]*

## Table 2: Plasmids and constructs used in this study

### Gateway entry clones

|         |                                                             |
|---------|-------------------------------------------------------------|
| pCFJ326 | <i>tbb-2</i> 3'UTR::OPERON::GFP [2-3]                       |
| pCFJ386 | <i>Peft-3</i> [4-1] 625 bp upstream and including ATG       |
| pCR110  | GFP[1-2]                                                    |
| pEGB05  | <i>Prab-3</i> [4-1] 1232 bp upstream of ATG                 |
| pET168  | <i>hif-1</i> cDNA A isoform [1-2]                           |
| pET210  | <i>Punc-14</i> [4-1] 1425 bp upstream of ATG                |
| pGH1    | <i>Punc-17</i> [4-1] 3229 bp upstream and including the ATG |
| pMH522  | <i>Punc-47</i> [4-1] 1254 bp upstream and including the ATG |
| pET187  | <i>Pdpy-7</i> [4-1] 351 bp upstream and including the ATG   |
| pET188  | <i>Pvha-6</i> [4-1] 881 bp upstream and including the ATG   |

### Gateway expression constructs

|        |                                                              |
|--------|--------------------------------------------------------------|
| pET171 | <i>Punc-47::hif-1 cDNA::tbb-2 3'UTR::OPERON::GFP_pCFJ150</i> |
| pET172 | <i>Punc-17::hif-1 cDNA::tbb-2 3'UTR::OPERON::GFP_pCFJ150</i> |
| pET182 | <i>Prab-3::hif-1 cDNA::tbb-2 3'UTR::OPERON::GFP_pCFJ150</i>  |
| pET187 | <i>Pdpy-7::hif-1 cDNA::tbb-2 3'UTR::OPERON::GFP_pCFJ150</i>  |
| pET188 | <i>Pvha-6::hif-1 cDNA::tbb-2 3'UTR::OPERON::GFP_pCFJ150</i>  |
| pET212 | <i>Punc-14::GFP::let-858 3'UTR_pCFJ150</i>                   |
| pET213 | <i>Punc-14::hif-1 cDNA::tbb-2 3'UTR::OPERON::GFP_pCFJ150</i> |
| pET216 | <i>Peft-3::hif-1 cDNA::tbb-2 3'UTR::OPERON::GFP_pCFJ150</i>  |

## References Cited

- BATES, M. N., N. GARRETT, and P. SHOEMACK, 2002 Investigation of health effects of hydrogen sulfide from a geothermal source. *Arch Environ Health* **57**: 405-411.
- BEAUCHAMP, R. O., J. S. BUS, J. A. POPP, C. J. BOREIKO, and D. A. ANDJELKOVICH, 1984 A critical review of the literature on hydrogen sulfide toxicity. *Crit Rev Toxicol* **13**: 25-97.
- BOS, E. M., H. VAN GOOR, J. A. JOLLES, M. WHITEMAN, and H. G. LEUVENINK, 2015 Hydrogen sulfide: physiological properties and therapeutic potential in ischaemia. *Br J Pharmacol* **172**: 1479-1493.
- BRENNER, S., 1974 The genetics of *Caenorhabditis elegans*. *Genetics* **77**: 71-94.
- BUDDE, M. W., and M. B. ROTH, 2010 Hydrogen Sulfide Increases Hypoxia-inducible Factor-1 Activity Independently of von Hippel-Lindau Tumor Suppressor-1 in *C. elegans*. *Mol Biol Cell* **21**: 212-217.
- DA GRACA, L. S., K. K. ZIMMERMAN, M. C. MITCHELL, M. KOZHAN-GORODETSKA, K. SEKIEWICZ, Y. MORALES, and G. I. PATTERSON, 2004 DAF-5 is a Ski oncoprotein homolog that functions in a neuronal TGF beta pathway to regulate *C. elegans* dauer development. *Development* **131**: 435-446.
- EASTMAN, C., H. R. HORVITZ, and Y. JIN, 1999 Coordinated transcriptional regulation of the *unc-25* glutamic acid decarboxylase and the *unc-47* GABA vesicular transporter by the *Caenorhabditis elegans* UNC-30 homeodomain protein. *J Neurosci* **19**: 6225-6234.
- FAWCETT, E. M., J. M. HOYT, J. K. JOHNSON, and D. L. MILLER, 2015 Hypoxia disrupts proteostasis in *Caenorhabditis elegans*. *Aging Cell* **14**: 92-101.
- FAWCETT, E. M., J. W. HORSMAN, and D. L. MILLER, 2012 Creating Defined Gaseous Environments to Study the Effects of Hypoxia on *C. elegans*. *JoVE* **65**: 4088.
- FRØKJÆR-JENSEN, C., M. W. DAVIS, M. AILION, and E. M. JORGENSEN, 2012 Improved Mos1-mediated transgenesis in *C. elegans*. *Nat Methods* **9**: 117-118.
- FRØKJÆR-JENSEN, C., M. W. DAVIS, C. E. HOPKINS, B. J. NEWMAN, J. M. THUMMEL, S.-P. OLESEN, M. GRUNNET, and E. M. JORGENSEN, 2008 Single-copy insertion of transgenes in *Caenorhabditis elegans*. *Nat Genet* **40**: 1375-1383.
- JIANG, H., R. GUO, and J. A. POWELL-COFFMAN, 2001 The *Caenorhabditis elegans hif-1* gene encodes a bHLH-PAS protein that is required for adaptation to hypoxia. *PNAS* **98**: 7916-7921.
- KILBURN, K. H., and R. H. WARSHAW, 1995 Hydrogen sulfide and reduced-sulfur gases adversely affect neurophysiological functions. *Toxicol Ind Health* **11**: 185-197.
- LEISER, S. F., H. MILLER, R. ROSSNER, M. FLETCHER, A. LEONARD, M. PRIMITIVO, N. RINTALA, F. J. RAMOS, D. L. MILLER, and M.

- KAEBERLEIN, 2015 Cell nonautonomous activation of flavin-containing monooxygenase promotes longevity and health span. *Science* **350**: 1375-1378.
- LI, L., P. ROSE, and P. K. MOORE, 2011 Hydrogen sulfide and cell signaling. *Annu Rev Pharmacol Toxicol* **51**: 169-187.
- MA, D. K., R. VOZDEK, N. BHATLA, and H. R. HORVITZ, 2012 CYSL-1 Interacts with the O<sub>2</sub>-Sensing Hydroxylase EGL-9 to Promote H<sub>2</sub>S-Modulated Hypoxia-Induced Behavioral Plasticity in *C. elegans*. *Neuron* **73**: 925-940.
- MELLO, C. C., J. M. KRAMER, D. STINCHCOMB, and V. AMBROS, 1991 Efficient gene transfer in *C. elegans*: extrachromosomal maintenance and integration of transforming sequences. *EMBO J* **10**: 3959-3970.
- MILLER, D. L., M. W. BUDDE, and M. B. ROTH, 2011 HIF-1 and SKN-1 coordinate the transcriptional response to hydrogen sulfide in *Caenorhabditis elegans*. *PLoS One* **6**: e25476.
- MILLER, D. L., and M. B. ROTH, 2007 Hydrogen sulfide increases thermotolerance and lifespan in *Caenorhabditis elegans*. *PNAS* **104**: 20618-20622.
- MILLER, D. L., and M. B. ROTH, 2009 *C. Elegans* Are Protected from Lethal Hypoxia by an Embryonic Diapause. *Curr Biol* **19**: 1233-1237.
- NONET, M. L., J. E. STAUNTON, M. P. KILGARD, T. FERGESTAD, E. HARTWIEG, H. R. HORVITZ, E. M. JORGENSEN, and B. J. MEYER, 1997 *Caenorhabditis elegans rab-3* mutant synapses exhibit impaired function and are partially depleted of vesicles. *J Neurosci* **17**: 8061-8073.
- OGURA, K., M. SHIRAKAWA, T. M. BARNES, S. HEKIMI, and Y. OHSHIMA, 1997 The UNC-14 protein required for axonal elongation and guidance in *Caenorhabditis elegans* interacts with the serine / threonine kinase UNC-51. *Genes Dev* **11**: 1801-1811.
- POCOCK, R., and O. HOBERT, 2008 Oxygen levels affect axon guidance and neuronal migration in *Caenorhabditis elegans*. *Nat Neurosci* **11**: 894-900.
- RAND, J. B., J. S. DUERR, and D. L. FRISBY, 2000 Neurogenetics of vesicular transporters in *C. elegans*. *FASEB J* **14**: 2414-2422.
- RICHARDSON, D. B., 1995 Respiratory effects of chronic hydrogen sulfide exposure. *Am J Ind Med* **28**: 99-108.
- SEMENZA, G. L., 2000 HIF-1: mediator of physiological and pathophysiological responses to hypoxia. *J Appl Physiol* (1985) **88**: 1474-1480.
- SEMENZA, G. L., 2001 HIF-1, O<sub>2</sub>, and the 3 PHDs: how animal cells signal hypoxia to the nucleus. *Cell* **107**: 1-3.
- SHEN, C., and J. A. POWELL-COFFMAN, 2003 Genetic Analysis of Hypoxia Signaling and Response in *C. elegans*. *Ann NY Acad Sci* **995**: 191-199.
- VANDIVER, M. S., and S. H. SNYDER, 2012 Hydrogen sulfide: a gasotransmitter of clinical relevance. *J Mol Med* **90**: 255-263.

- WANG, R., 2012 Physiological implications of hydrogen sulfide: a whiff exploration that blossomed. *Physiol Rev* **92**: 791-896.
- WOLKOW, C. A., K. D. KIMURA, M. S. LEE, and G. RUVKUN, 2000 Regulation of *C. elegans* life-span by insulinlike signaling in the nervous system. *Science* **290**: 147-150.
- 2017 Wormbase website, <http://www.wormbase.org>, release WS259, July 2017.
- WU, D., J. WANG, H. LI, M. XUE, A. JI, and Y. LI, 2015 Role of Hydrogen Sulfide in Ischemia-Reperfusion Injury. *Oxid Med Cell Longev* **2015**: 186908.

# Figure 1

**A**

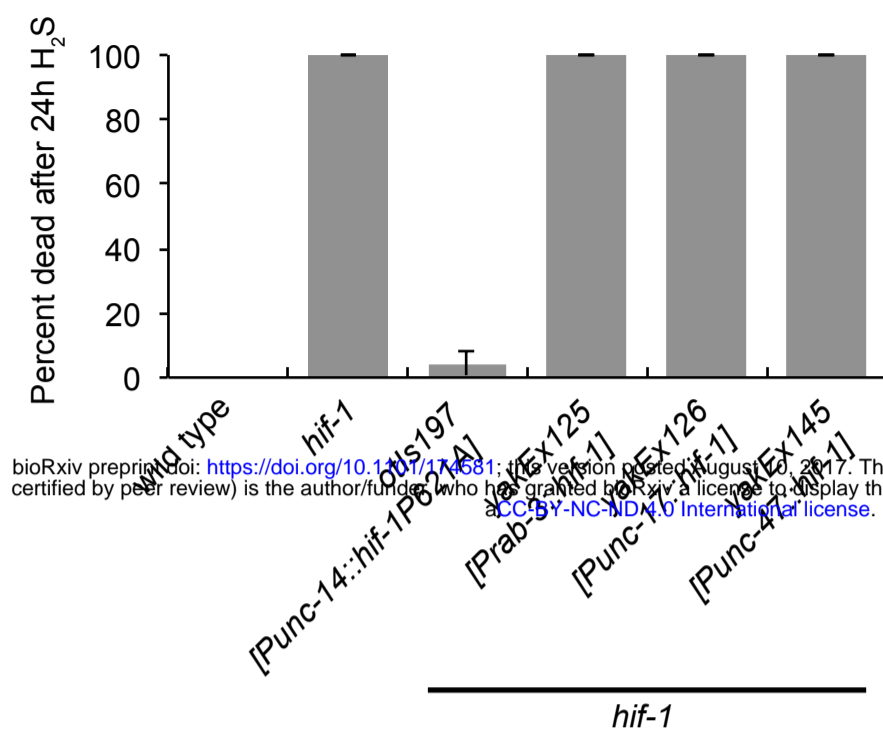

**B**

*hif-1* isoforms

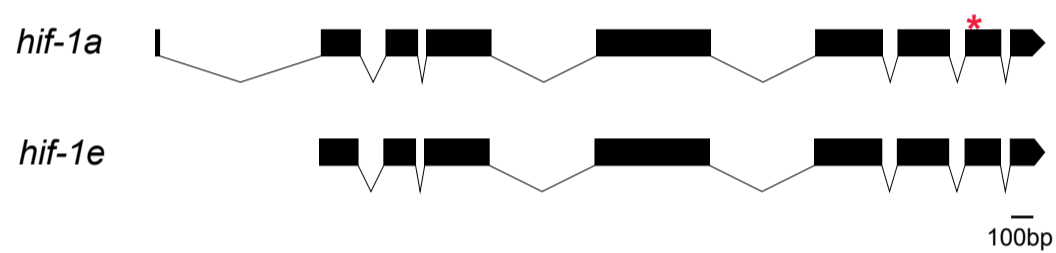

**C**

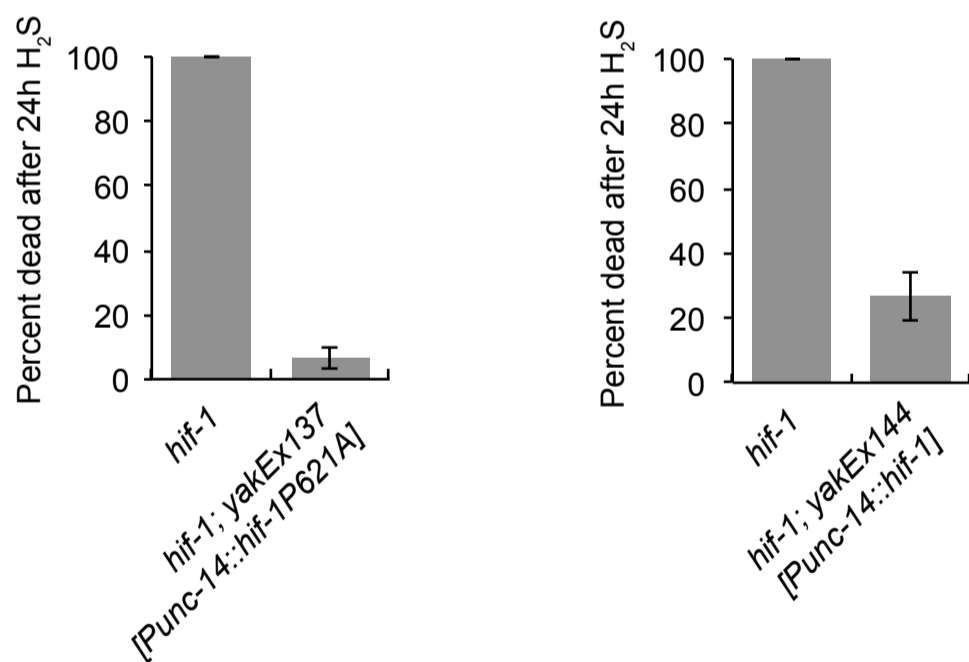

**Figure 2**

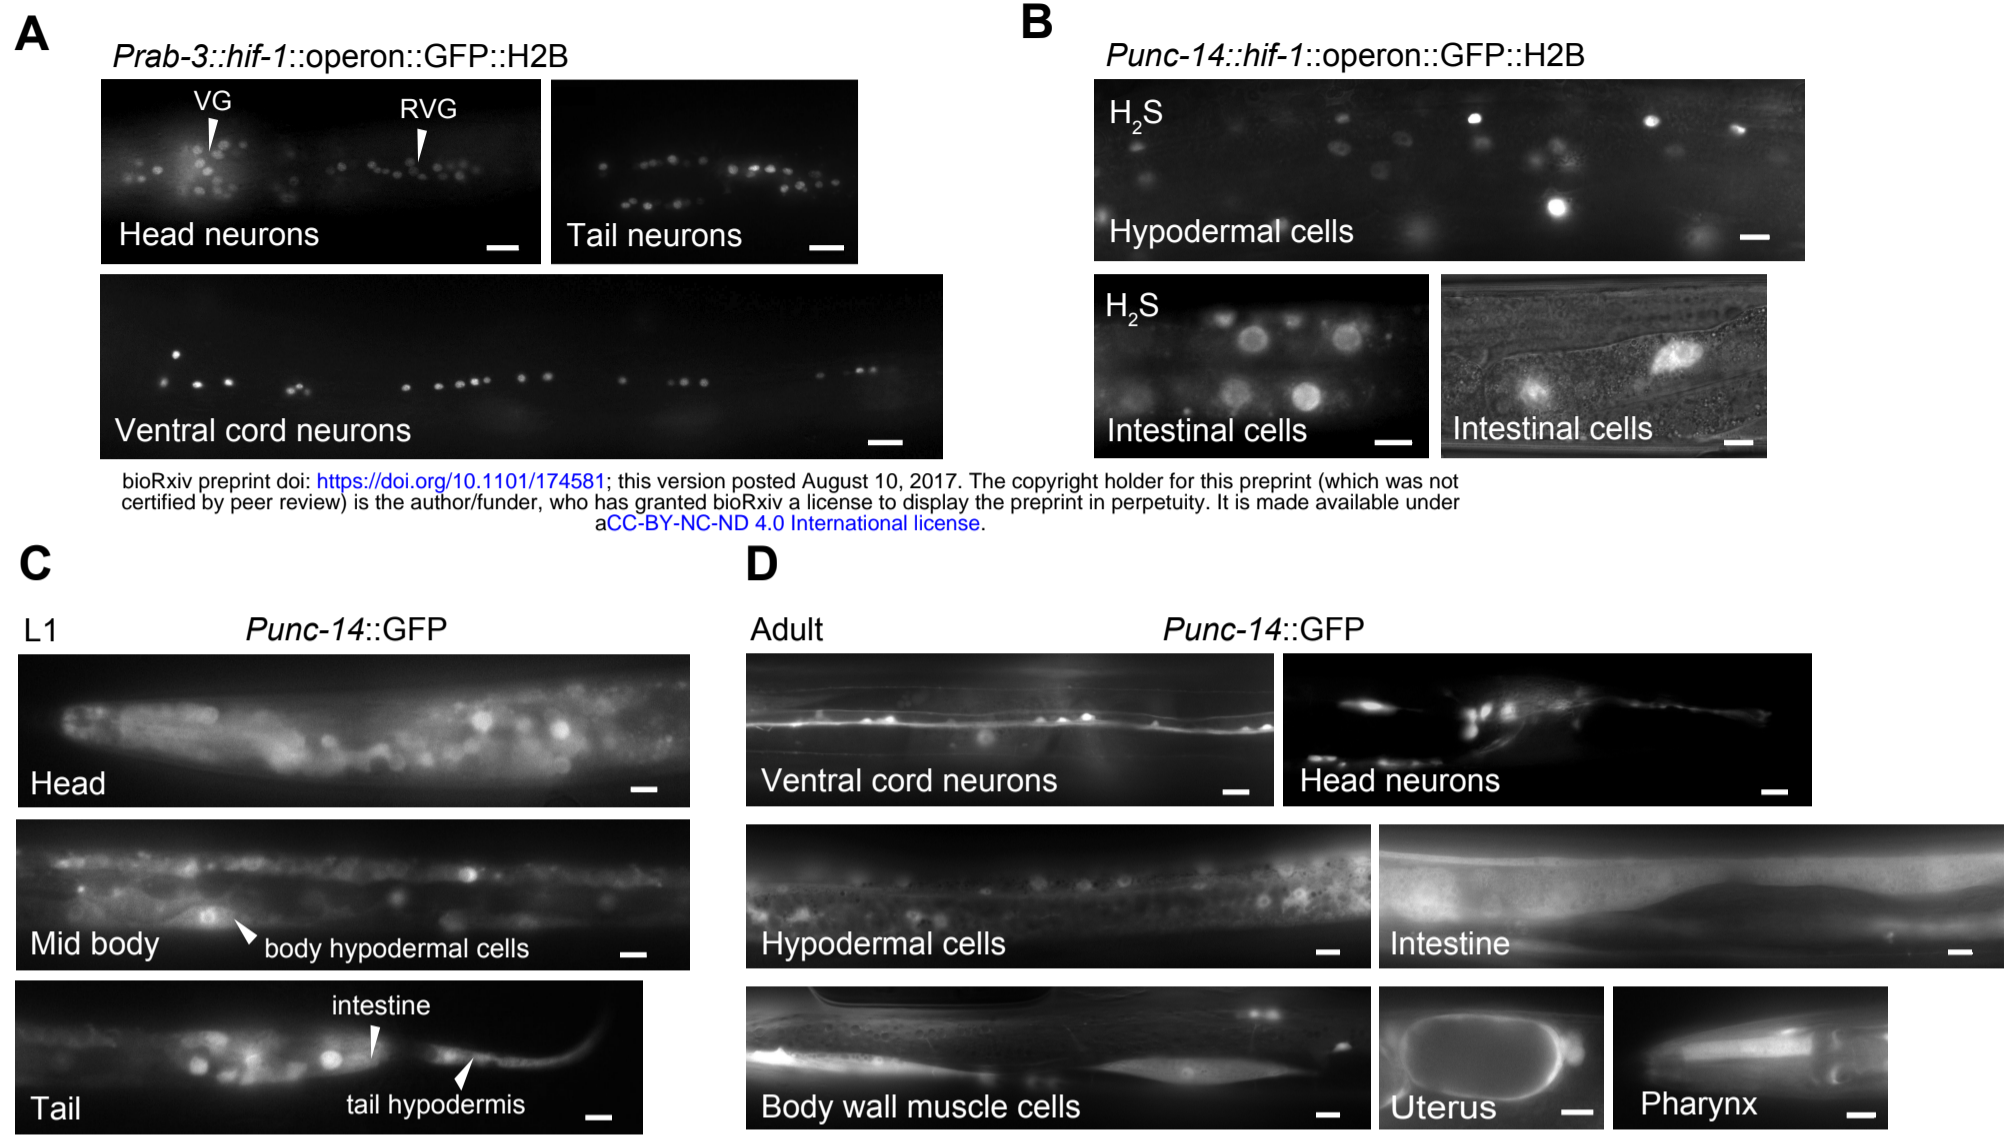

# Figure 3

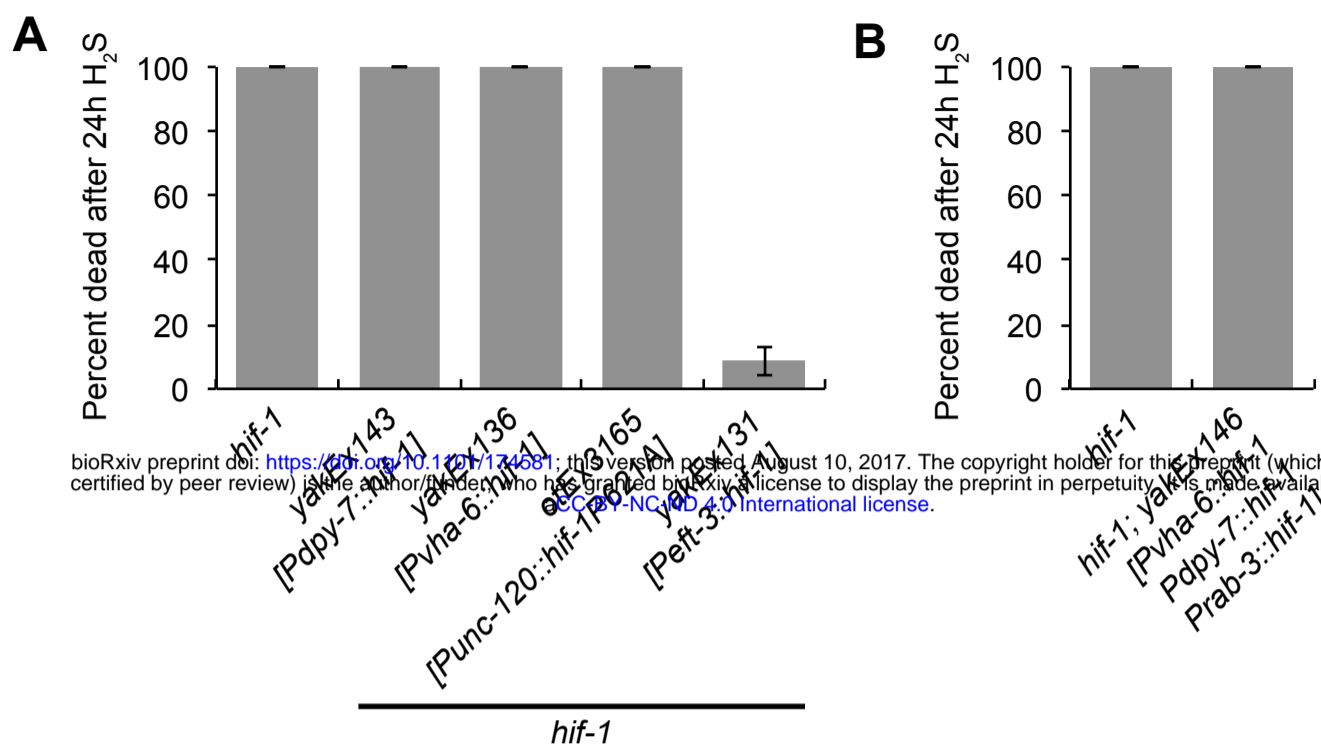

Source: http://www.biorxiv.org/content/10.1101/174581v1.full.pdf
